# Supplementary material for: Serine catabolism is essential to maintain mitochondrial respiration in mammalian cells
Source: PubMed Central journal article supplement (PMC6238390; doi:10.26508/lsa.201800036), 2018-05-21
Supplement: LSA-2018-00036_TableS1.pdf [file LSA-2018-00036_TableS1.pdf]

**Table S1: sgRNA for editing SHMT**

| <b>Species</b> | <b>Gene</b> | <b>Sequence</b>       |
|----------------|-------------|-----------------------|
| human          | SHMT1       | CATCTGCAATCTTCCGTAGC  |
| human          | SHMT1       | TCAGGTGGCCCCATCCGGA   |
| human          | SHMT2       | CAACCTCACGACCGGATCAT  |
| human          | SHMT2       | TCTCAGGATCACTGTCCGAC  |
| mouse          | SHMT2       | GCTGGAGGTTGGACGGGCCAG |
| mouse          | SHMT2       | TCTGCAGAAGCTCCCACATCT |
