# Supplementary material for: Serine catabolism is essential to maintain mitochondrial respiration in mammalian cells
Source: PubMed Central journal article supplement (PMC6238390; doi:10.26508/lsa.201800036), 2018-05-21
Supplement: LSA-2018-00036_TableS2.pdf [file LSA-2018-00036_TableS2.pdf]

**Table S2: qPCR primer for human gene**

| <b>Gene</b> | <b>Forward sequence</b>  | <b>Reverse sequence</b>  |
|-------------|--------------------------|--------------------------|
| MT-ND1      | ATGGCCAACCTCCTACTCCTCATT | TTATGGCGTCAGCGAAGGGTTGTA |
| MT-ND2      | CTAGCCCCCATCTCAATCATA    | GAATGCGGTAGTAGTTAGGAT    |
| MT-ND3      | CCCTACCATGAGCCCTACAAACAA | AGTCACTCATAGGCCAGACTTAGG |
| MT-ND4/4L   | ACAAGCTCCATCTGCCTACGACAA | TTATGAGAATGACTGCGCCGGTGA |
| MT-ND5      | ATCGGTTTCATCCTCGCCTTAGCA | ACCTAATTGGGCTGATTTGCCTGC |
| MT-ND6      | AGGATTGGTGCTGTGGGTGAAAGA | ATAGGATCCTCCCGAATCAACCCT |
| MT-COI      | ACCCTAGACCAAACCTACGCCAAA | TAGGCCGAGAAAGTGTTGTGGGAA |
| MT-CO2      | ACAGATGCAATTCCCGGACGTCTA | GGCATGAAACTGTGGTTTGCTCCA |
| MT-CO3      | ACTTCCACTCCATAACGCTCCTCA | TGGCCTTGGTATGTGCTTTCTCGT |
| MT-ATP6/8   | TAGCCCACTTCTTACCACAAGGCA | TGAGTAGGTGGCCTGCAGTAATGT |
| MT-CYB      | TCCTCCCGTGAGGCCAAATATCAT | AAAGAATCGTGTGAGGGTGGGACT |
| RNA28S      | CCGTGCCTTGGAAAGCGTCGC    | CAGAGGCTGTTACCTTGGAGA    |
| PPIA        | GGCAAATGCTGGACCCAACACA   | TGCTGGTCTTGCCATTCCTGGA   |
